# Supplementary material for: Metabolomics of Solanum lycopersicum Infected with Phytophthora infestans Leads to Early Detection of Late Blight in Asymptomatic Plants
Source: MDPI journal article supplement (doi:10.3390/molecules23123330), 2018-12-15
Supplement: s1 [file s1]

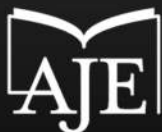

# EDITORIAL CERTIFICATE

This document certifies that the manuscript listed below was edited for proper English language, grammar, punctuation, spelling, and overall style by one or more of the highly qualified native English speaking editors at American Journal Experts.

## Manuscript title:

Metabolomics of Solanum lycopersicum infected by Phytophthora infestans leads to early detection of the Late blight in asymptomatic plants

## Authors:

Chiara Carazzone

## Date Issued:

November 21, 2018

## Certificate Verification Key:

E247-FEB2-90D2-F39F-CD82

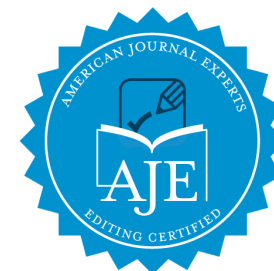

This certificate may be verified at [www.aje.com/certificate](http://www.aje.com/certificate). This document certifies that the manuscript listed above was edited for proper English language, grammar, punctuation, spelling, and overall style by one or more of the highly qualified native English speaking editors at American Journal Experts. Neither the research content nor the authors' intentions were altered in any way during the editing process. Documents receiving this certification should be English-ready for publication; however, the author has the ability to accept or reject our suggestions and changes. To verify the final AJE edited version, please visit our verification page. If you have any questions or concerns about this edited document, please contact American Journal Experts at [support@aje.com](mailto:support@aje.com).
